# Supplementary material
Source: PubMed Central journal article supplement (PMC4076069)

## Supplemental Data

**Table 1S: Primers for qRT-PCR.**

|             | Accession Number | Forward                   | Reverse                 | Species |
|-------------|------------------|---------------------------|-------------------------|---------|
| ATGL        | NM_025802.3      | TGTGGCCTCATTCTCCTAC       | TCGTGGATGTTGGTGGAGCT    | Mouse   |
| ADPN        | NM_054088.3      | ATTCCCCTCTTCTCTGGCCTA     | ATGTCATGCTCACCGTAGAAAGG | Mouse   |
| TGH         | NM_053200.2      | CTCAGAGACCCACAGAGCCCTTGTC | AAGCTGTGCACGCAGCAAGAGA  | Mouse   |
| AADAC       | NM_023383.1      | TCCCACCCACGTCTGATGAGC     | AAGCCCCGCCTGAGAGCCAT    | Mouse   |
| CGI58       | NM_026179.2      | CTTGCTTGGACACAACCTG       | GAGGTGACTAACCCCTTGATGG  | Mouse   |
| Cyclophilin | NM_008907.1      | CTTCTTGCTGGTCTTGCCATTCT   | GGATGGCAAGCATGTGGTCTTTG | Mouse   |
| CPT1a       | NM_013495.2      | TTAACAGCAACTACTACGCC      | CCAGAAGACGAATAGGTTTGAG  | Mouse   |
| CPT2        | NM_009949.1      | CAGTTCAGGAAGACAGAAGTG     | CGAAGTGTCTTCAGAAACCG    | Mouse   |
| LCAD        | NM_007381.3      | AAACGTCTGGACTCCGGTTC      | GTACCACCGTAGATCGGCTG    | Mouse   |
| MCAD        | NM_007382.4      | TCAAGATCGCAATGGGTGCT      | GCTCCACTAGCAGCTTTCCA    | Mouse   |
| SCAD        | NM_007383.2      | GTGACCTGCAACCGAGAAGA      | AGGGCGGCTCAAATGAAGAA    | Mouse   |
| SIRT3       | NM_022433.2      | CGCTAAACTTCTCCCGGGTT      | ACACAGAGGGATATGGGCCT    | Mouse   |
| PDK4        | NM_013743.2      | GCCAACCCTACGGATCCTAAC     | TGTTCACTAAGCGGTCAGGC    | Mouse   |
| ATGL        | NM_020376.3      | AAGCGGAGGATTACTIONCGCAG   | AAGCGGATGGTGAAGGACAG    | Human   |
| Cyclophilin | NM_021130        | AAGACTGAGTGGTTGGATGG      | CGAGAGCACAAAGATTCTAGG   | Human   |
| CPT1a       | NM_001031847.2   | AGTTCTCTTGCCCTGAGACG      | GTGATGTCCATGGTCTCTCTCC  | Human   |
| CPT2        | NM_000098.2      | GTAGCACTGCCGCATTCAAG      | GCCATGGTACTTGGAGCACT    | Human   |
| LCAD        | NM_001608.3      | ATACGGTTGCCAGCTAGTGC      | TGCACTGTCTGTAGGTGAGC    | Human   |
| MCAD        | NM_000016.4      | GCTGCAGGGTCCTGAGAAGTA     | TATTCTGCAGCCACTGGGATG   | Human   |
| SCAD        | NM_000017.2      | GGAACATCTCTTCCCAGCGG      | GAGGGCAAAGCAGCCAATTT    | Human   |
| SIRT3       | NM_001017524.2   | TGGCGGCAGGGACGATTATT      | ATCGTACTGCTGGAGGTTGC    | Human   |
| PDK4        | NM_002612.3      | TGGTTTTGGTTACGGCTTGC      | AGTGTCCCTCTTCACATGGC    | Human   |
| MTTP        | NM_008642.1      | CACAATTATGACCGTTTCTCCA    | CAATCACCACCTGACTACCA    | Mouse   |
| FGF21       | NM_020013.4      | TACACAGATGACGACCAAGAC     | AAAGTGAGGCGATCCATAGAG   | Mouse   |

|                 |             |                          |                       |       |
|-----------------|-------------|--------------------------|-----------------------|-------|
| LXR $\alpha$    | NM_013839.3 | GTTTCTCCTGATTCTGCAACG    | ACCCTATCCCTAAAGCAACC  | Mouse |
| PGC1 $\beta$    | NM_133249.2 | GTGTTTCGGTGAGATTGTAGAG   | CAGATGTGGGATCATAGTCAG | Mouse |
| CYP7 $\alpha$   | NM_007824.2 | TGGAATAAGGAGAAGGAAAGTAGG | AGGGAGTTTGTGATGAAGTG  | Mouse |
| PPAR $\gamma$ 2 | NM_011146.3 | GAGCACTTCACAAGAAATTACC   | TCTACTTTGATCGCACTTTGG | Mouse |

## Supplementary Figures

**FIGURE 1S.** *Effect of diet and Elovl5 activity on glycerol-3-phosphate 2-O-acyl transferase 1 (GPAT1) expression in livers of lean and obese mice.* Mouse liver RNA from fasted and re-fed lean and obese mice infected with either Ad-Luc or Ad-Elovl5 was prepared and assayed for GPAT1 and cyclophilin mRNA by qRT-PCR. GPAT1 mRNA abundance is represented as mRNA Abundance-Fold Change from fasted lean (LFD) Ad-Luc infected mice; mean  $\pm$  SD, n=6; **a**,  $p < 0.05$  versus fasted lean LFD-fed mice infected with Ad-Luc; **b**,  $p < 0.05$  versus fasted lean LFD-fed mice infected with Ad-Elovl5; **c**,  $p < 0.05$  versus re-fed lean LFD-fed mice infected with Ad-Luc; one-way ANOVA plus post-hoc HSD.

**FIGURE 2S.** *Diet and Elovl5 effects on hepatic microsomal transfer protein (MTTP) expression.* Mouse liver RNA from fasted lean (LFD) and obese (HFD) mice infected with either Ad-Luc or Ad-Elovl5 was assayed for MTTP and cyclophilin mRNA by qRT-PCR. MTTP mRNA was represented relative to cyclophilin as mean  $\pm$  SD, n=6.

**FIGURE 3S.** *Hepatic nuclear abundance of PPAR subtypes in fasted lean and obese mice.* Panels A & B: Hepatic nuclear extracts from fasted lean and obese mice infected with Ad-Luc or Ad-Elovl5 were assayed for PPAR $\alpha$  and TATA-binding protein (TBP) [Methods]. Panel A is the representative immunoblot with extracts from 2 separate mice per group. Panel B is the quantified level PPAR $\alpha$  relative to the loading control TBP; mean  $\pm$  S.D., n=4. **a**,  $p < 0.05$  versus LFD fed mice infected with Ad-Luc. Panels C & D. The nuclear abundance of PPAR $\alpha$ , PPAR $\delta$ , PPAR $\gamma$ 1 and PPAR $\gamma$ 2 was quantified as

described above. Livers from obese (HFD-fed) mice infected with Ad-Luc or Ad-Elovl5 were used in this analysis. Panel C is the representative immunoblot with extracts from 3 mice/group. Panel D is the quantified level of the PPAR subtypes. Results are from 2 separate studies and are expressed as mean  $\pm$  SD, n=6. a,  $p \leq 0.05$  versus high fat (HF) diet fed Ad-Luc infected mice; one-way ANOVA with post-hoc HSD.

**FIGURE 4S.** *Fatty acid oxidation of saturated, mono- and polyunsaturated fatty acids in AML12 cells.* AML12 cells were treated with  $^{14}\text{C}$ -label fatty acids at 100  $\mu\text{M}$  in serum-free media containing 33  $\mu\text{M}$  bovine serum albumin (BSA) for 6 hours. Cells and media were harvested; cells were assayed for total protein and media was assayed for acid soluble material (ASM), an indicator of FAO [Methods]. Results are expressed as ASM, nmoles/mg protein and represented as the average  $\pm$  range of duplicate samples.

**Figure 5S.** Regulation of PDK4, ATGL and Rictor mRNA by fatty acids, PPAR agonist and antagonist in HepG2 cells. Panels A & B. HepG2 cells were treated with EPA (100  $\mu\text{M}$ ), GW0742 (1  $\mu\text{M}$ ) [Panels A & B] or cis-VA (100  $\mu\text{M}$ ) [Panel C] in serum free media containing 33  $\mu\text{M}$  BSA for the times indicated in the figure. RNA was extracted and PDK4, ATGL, rictor and cyclophilin mRNA was quantified by qRT-PCR. Results are expressed as mRNA abundance-Fold Change for PDK4 (Panel A), ATGL (Panel B); and Rictor (Panel C); mean  $\pm$  SD, n=3. Panel D. HepG2 cells were treated with vehicle (Veh) or cis-VA (100  $\mu\text{M}$ ) with BSA as above in the absence or presence of PPAR subtype specific antagonist GW6471 (PPAR $\alpha$ , 1  $\mu\text{M}$ ), GSK3787 (PPAR $\beta$ , 1  $\mu\text{M}$ ) or T0070907 (PPAR $\gamma$ , 4 nM) for 48 hrs. ATGL and cyclophilin RNA was quantified as

above and represented as the mean  $\pm$  S.D., n=6. a, p<0.05 versus vehicle-treated cells. Student's t-test.

# Supplemental Fig. 1S

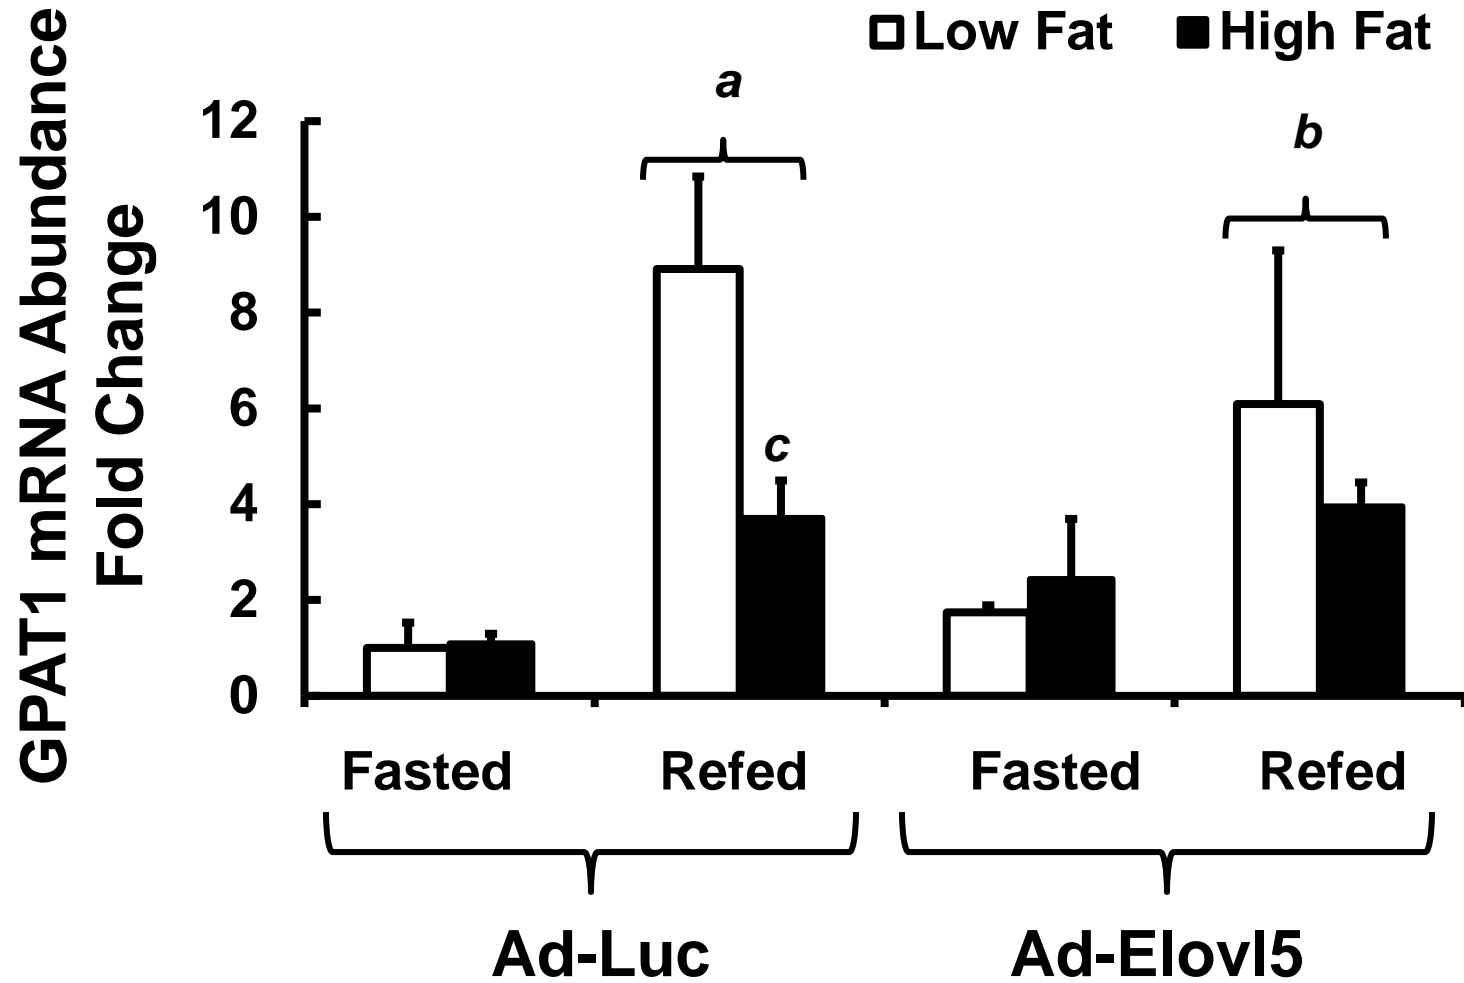

# Supplemental Fig. 2S

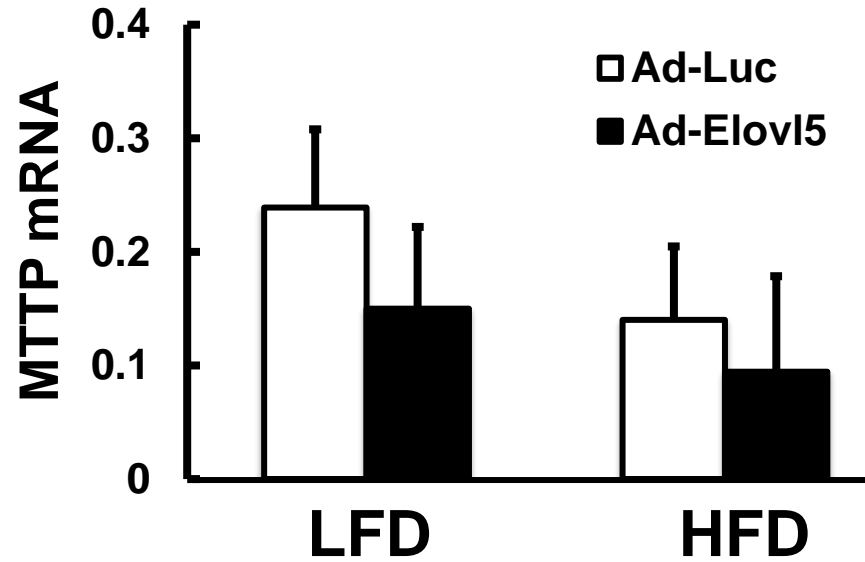

# Supplemental Fig. 3S

**A.**

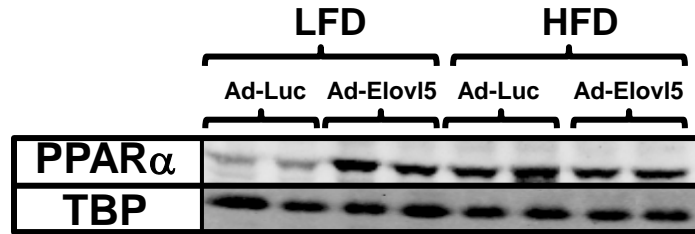

**B.**

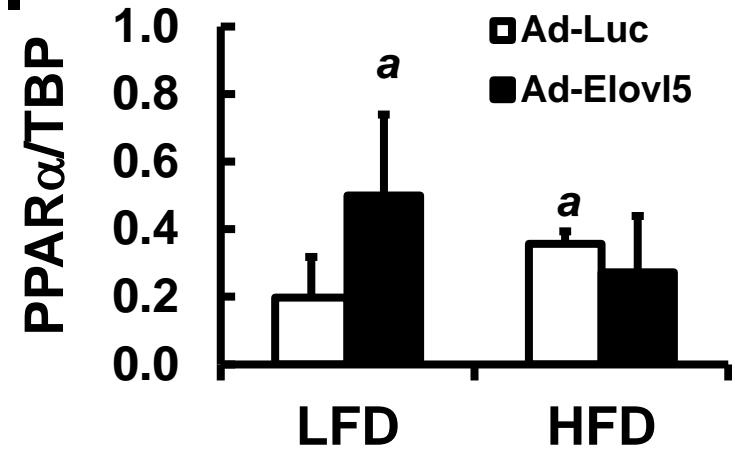

**C.**

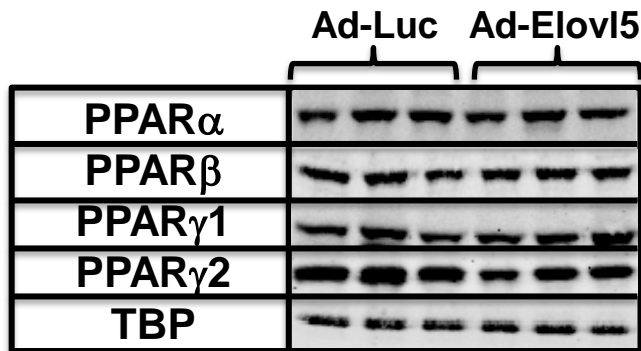

**D.**

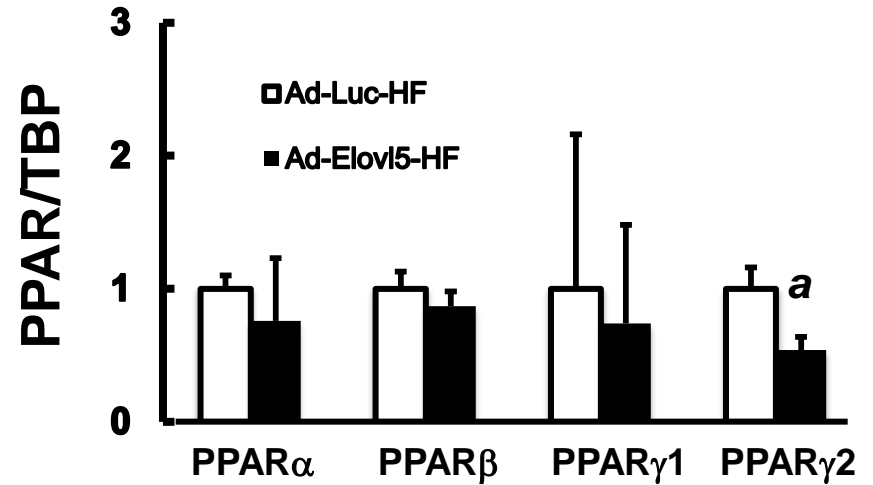



# Supplemental Fig. 4S

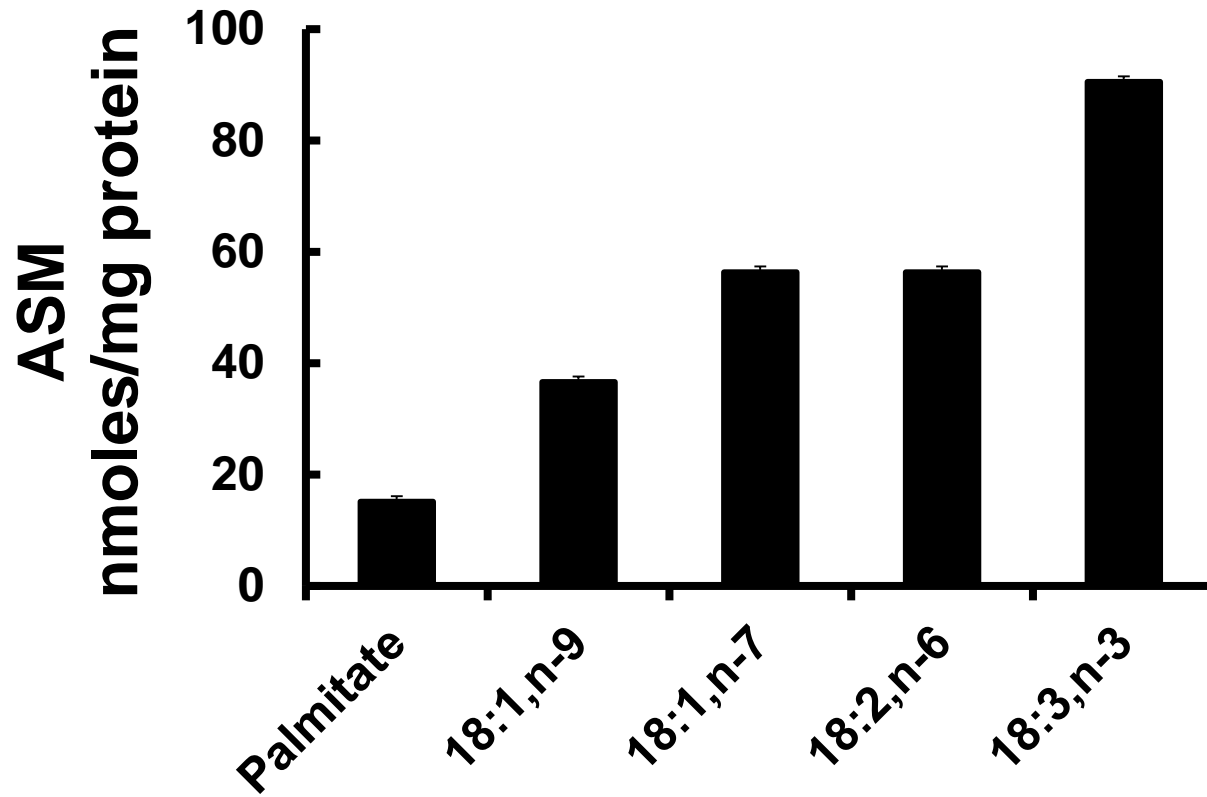

# Supplemental Figure 5S:

## A. PDK4

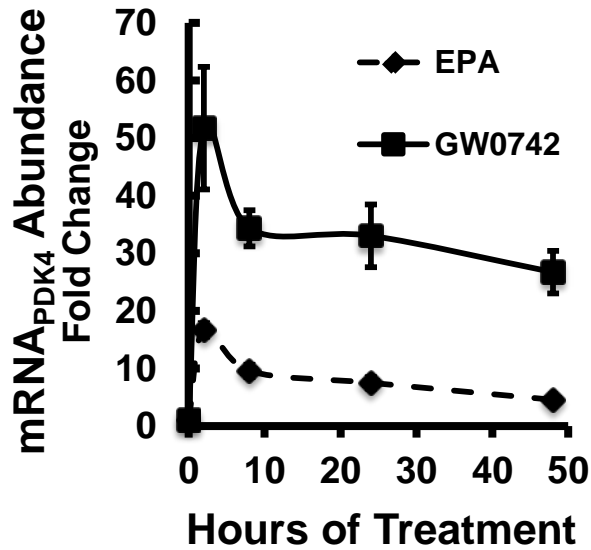

## B. ATGL

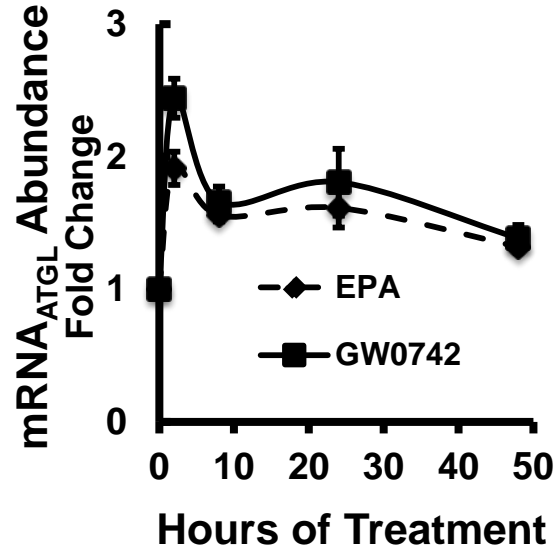

## C. Rictor & ATGL

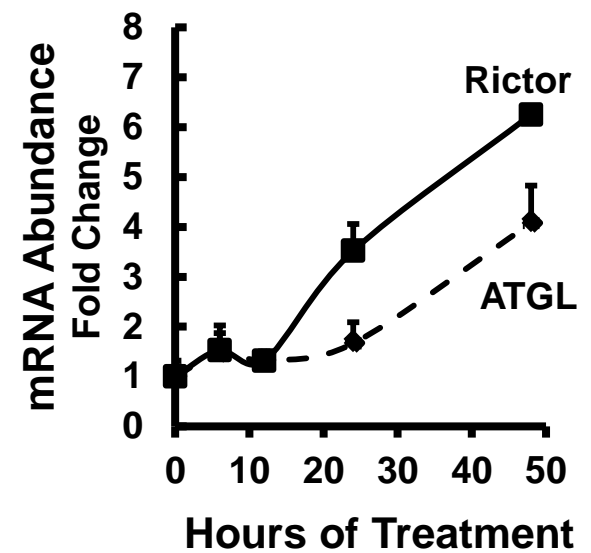

## D. ATGL

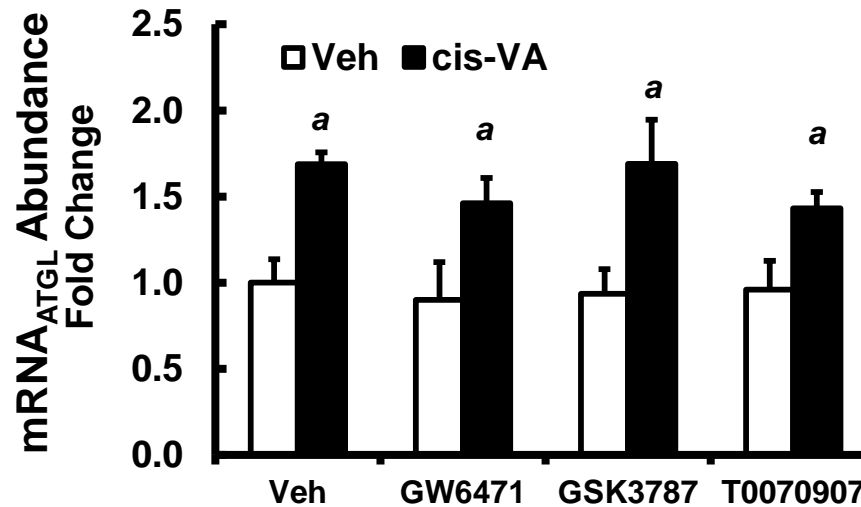

Supplement: supp_M050062_jlr.M050062-1.pdf [file supp_M050062_jlr.M050062-1.pdf]
